# Supplementary material for: Genome maintenance and bioenergetics of the long-lived hypoxia-tolerant and cancer-resistant blind mole rat, Spalax: a cross-species analysis of brain transcriptome
Source: PubMed Central journal article supplement (PMC5146665; doi:10.1038/srep38624), 2016-12-09
Supplement: srep38624-s1.pdf [file srep38624-s1.pdf]

# Genome maintenance and bioenergetics of the long-lived hypoxia-tolerant and cancer-resistant blind mole rat, *Spalax*: a cross-species analysis of brain transcriptome

Assaf Malik, Vered Domankevich, Han Lijuan, Fang Xiaodong, Abraham Korol, Aaron Avivi, Imad Shams

## Supplementary Figures

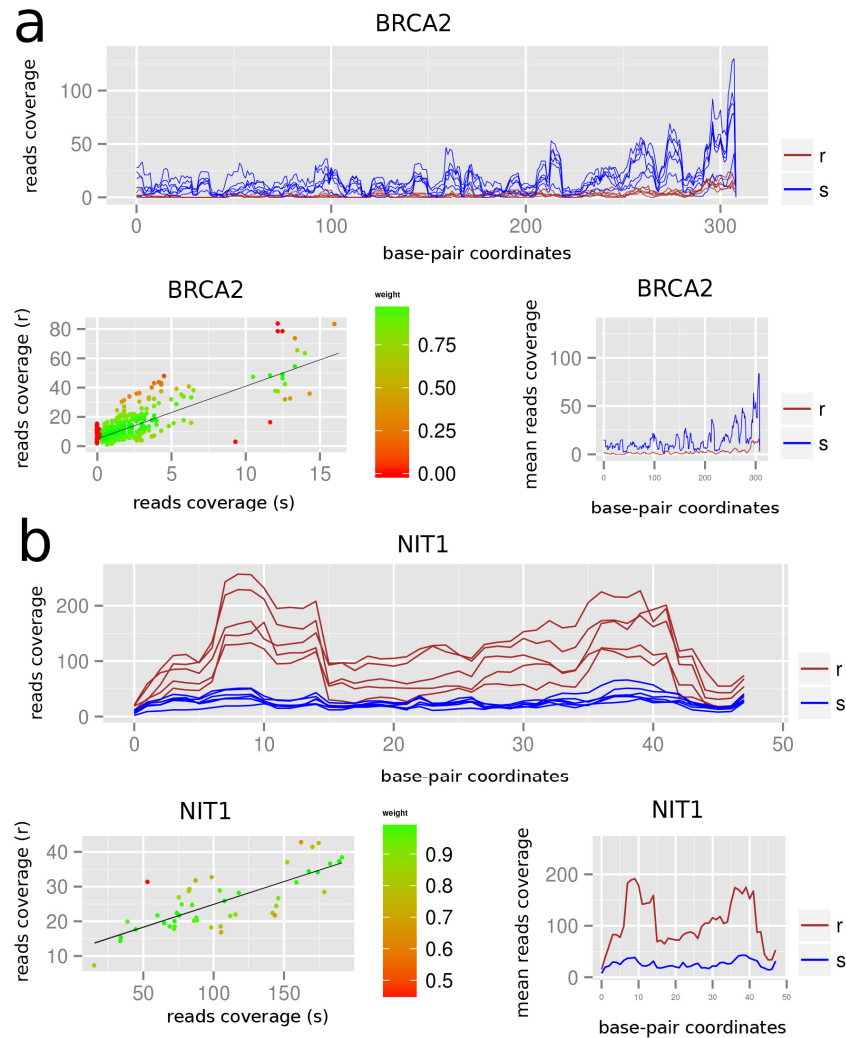

**Figure S1: RNA-Seq cross-species coverage levels.** Here, the *Spalax* and rat orthologs of the genes *BRCA2* and *Nit1* are used as examples. These genes were tested also in qPCR (Fig. 3, main text). Rat is denoted by “r”, and *Spalax* by “s”. **Main panel (a,b):** RNA-seq coverage levels in ~300, and ~50 intervals of 25bp of *Spalax* vs. rat comparable exon regions. **Left (a,b):** Interspecies coverage relationships. In this case, the Pearson correlation of average coverage between species is ~0.77 and ~0.7, for the two genes, respectively. The green to red weight gradient reflects distance from a regression line found using RLM function. **Right (a,b):** average coverage levels. In this gene, *Spalax* average coverage is lower than that of rat in most sub-regions, as indicated by a significant Sign-test. For all genes, the DE analysis itself was conducted using EdgeR.

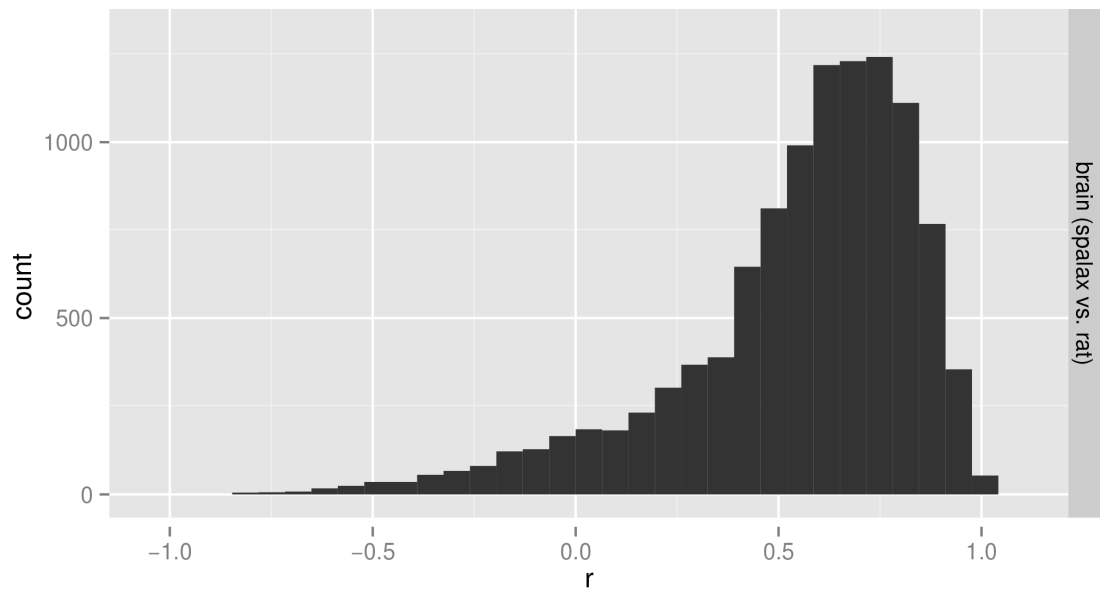

**Figure S2: Frequency distribution of Pearson correlations of RNA-Seq coverage, along comparable gene regions of orthologs, based on all tested genes. *Spalax* vs. rat brain transcriptomes were tested. The X axis represents correlation levels. The Y axis represents the counts of genes within each correlation category.**

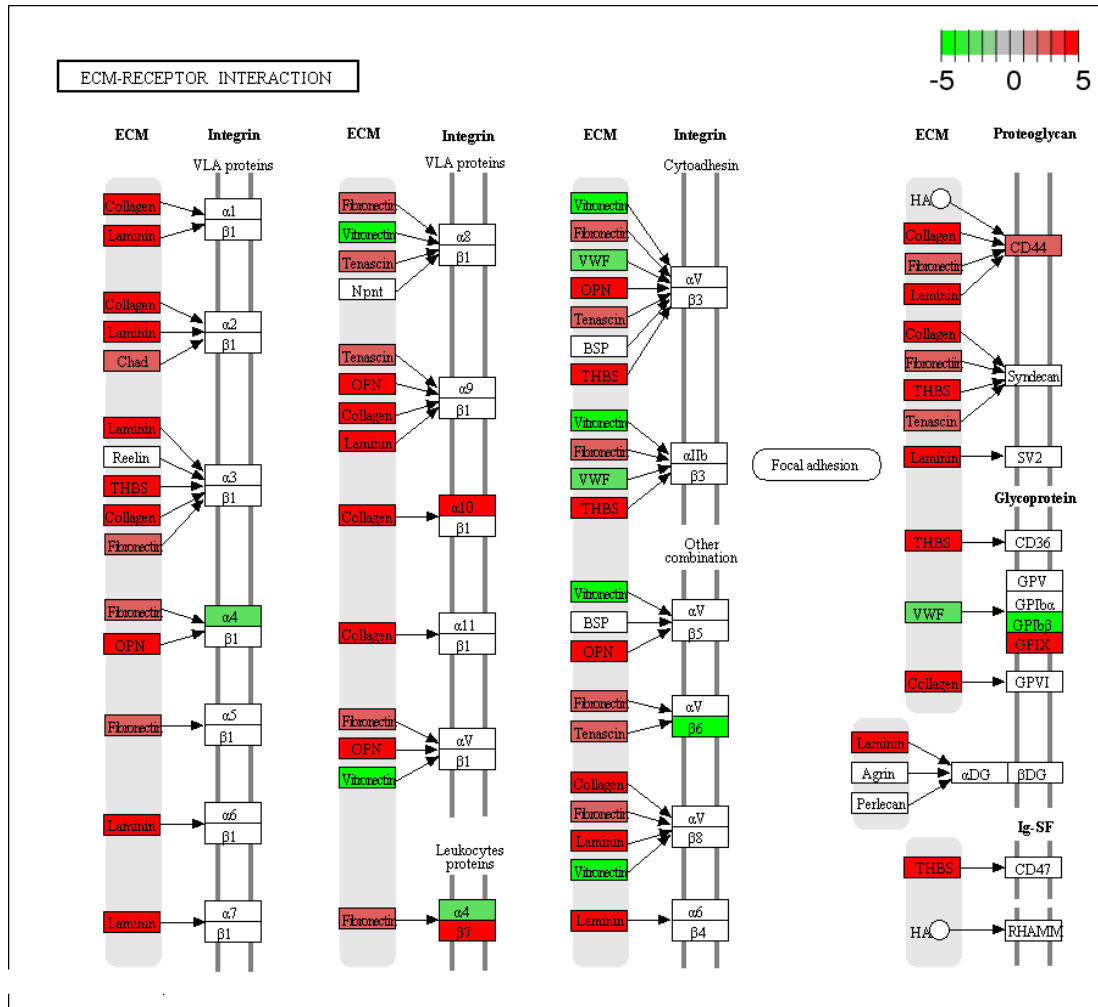

**Figure S3: Upregulated/downregulated *Spalax* vs. rat genes, in the brain, within the ECM-receptor interaction group, (fold change > 2 or < -2). DE genes, with at least 2 fold change, in *Spalax* vs. rat are superimposed on the KEGG ECM-receptor interaction pathway of rat (kegg 04512). Color scale represents fold change value.**

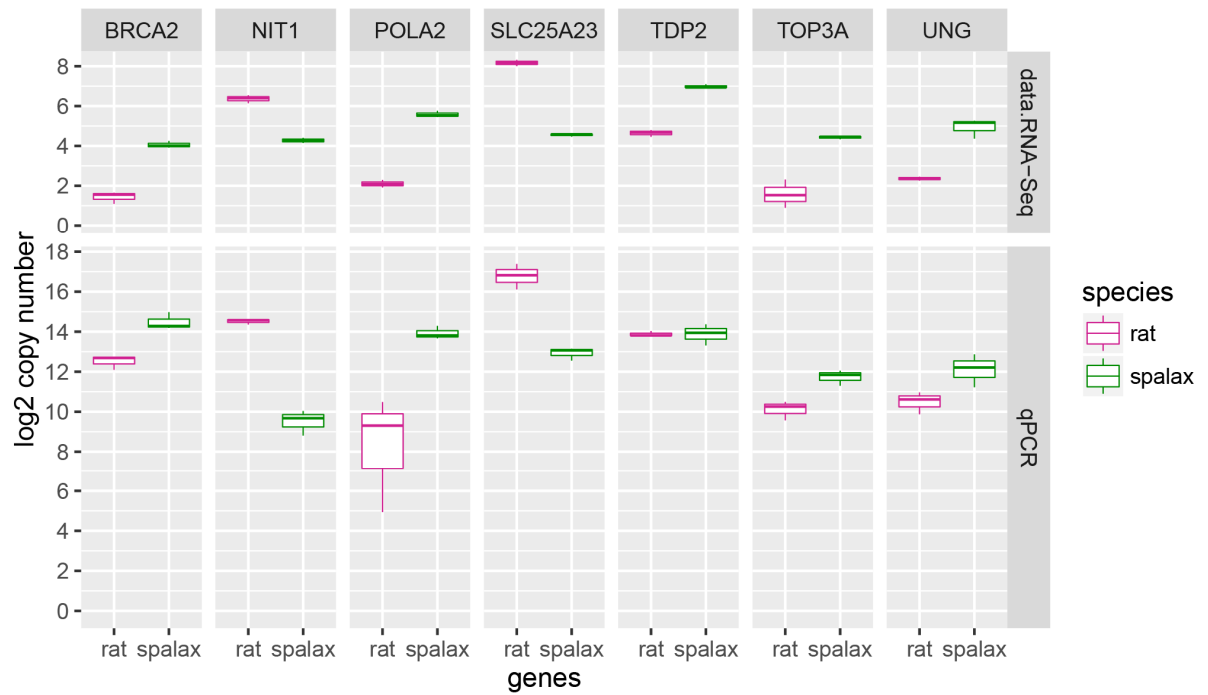

**Figure S4: Comparison of RNA-Seq normalized read counts, to the total Real time Quantitative PCR copy numbers.** The upper panel shows the RNA-Seq FPKM levels for seven genes, five of them upregulated in *Spalax* vs. rat in the brain, and two downregulated. The lower panel shows to total (not normalized) Real time Quantitative PCR copy numbers for the same genes, in *Spalax* vs. rat brain samples. In six out of seven tests, the results of both tests show the same trend, with significant DE.

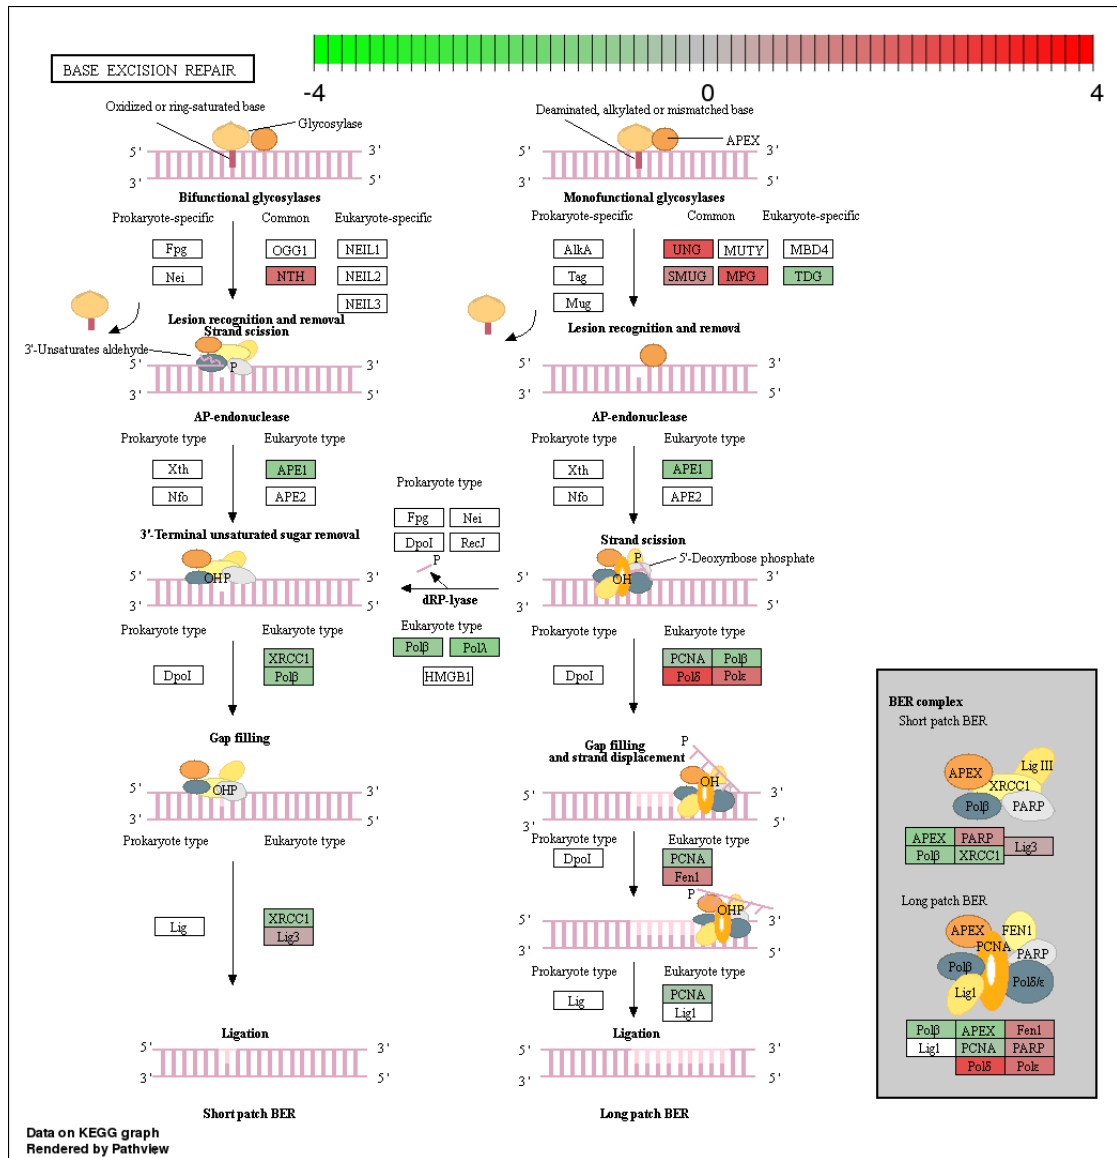

**Figure S5: Genes that are significantly differentially expressed, at any fold change, in *Spalax* compared to rat whole brain tissues and are related to Base Excision Repair pathway.** Genes with adjusted  $p$ -value  $< 0.05$  (see Table S5) were superimposed on the Base Excision Repair pathway of rat (rno03410, obtained by KEGG, Kanehisa Laboratories). Color scale represents  $\log_2FC$  value.

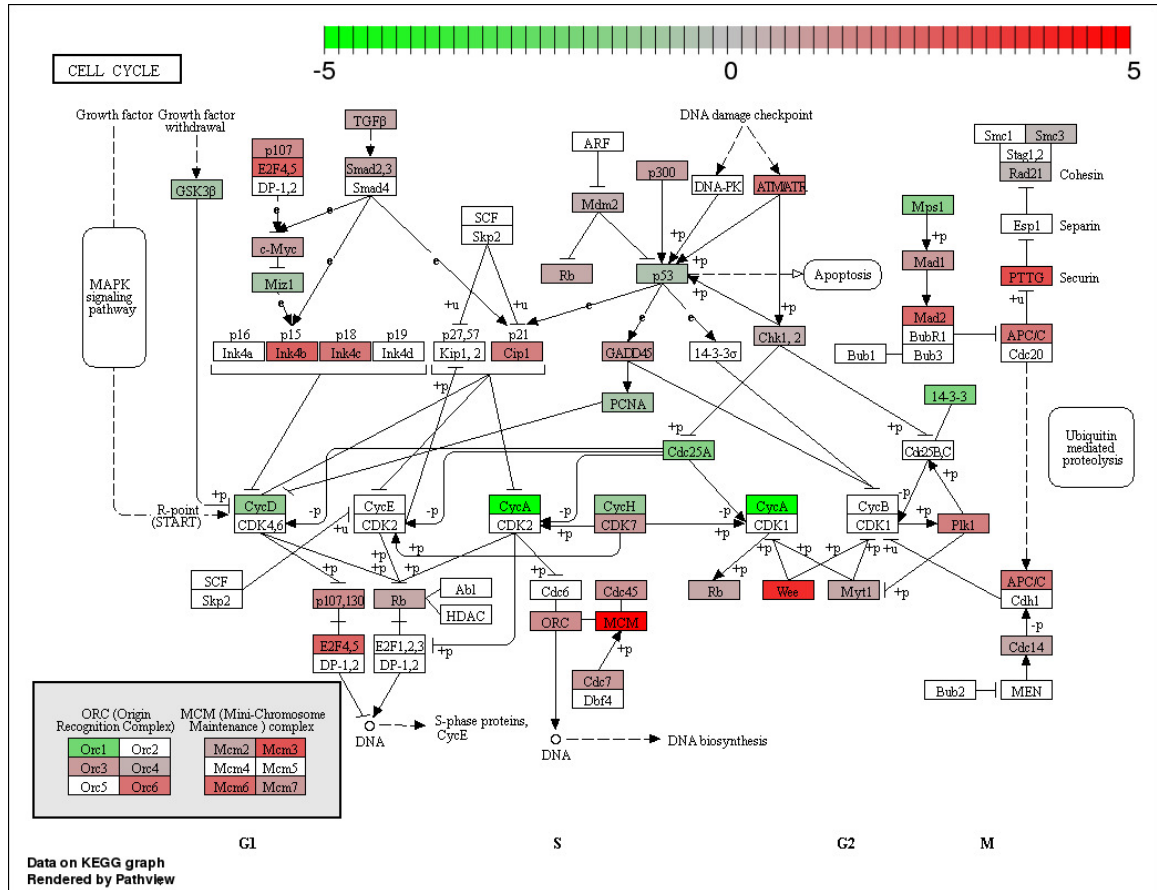

**Figure S6: Genes that are significantly differentially expressed, at any fold change, in *Spalax* compared to rat whole brain tissues and are related to Cell Cycle pathway.** Genes with adjusted  $p$ -value  $< 0.05$  (see Table S5) are superimposed on the Cell Cycle pathway of rat (rno04110, obtained by KEGG, Kanehisa Laboratories). Color scale represents  $\log_2FC$  value.

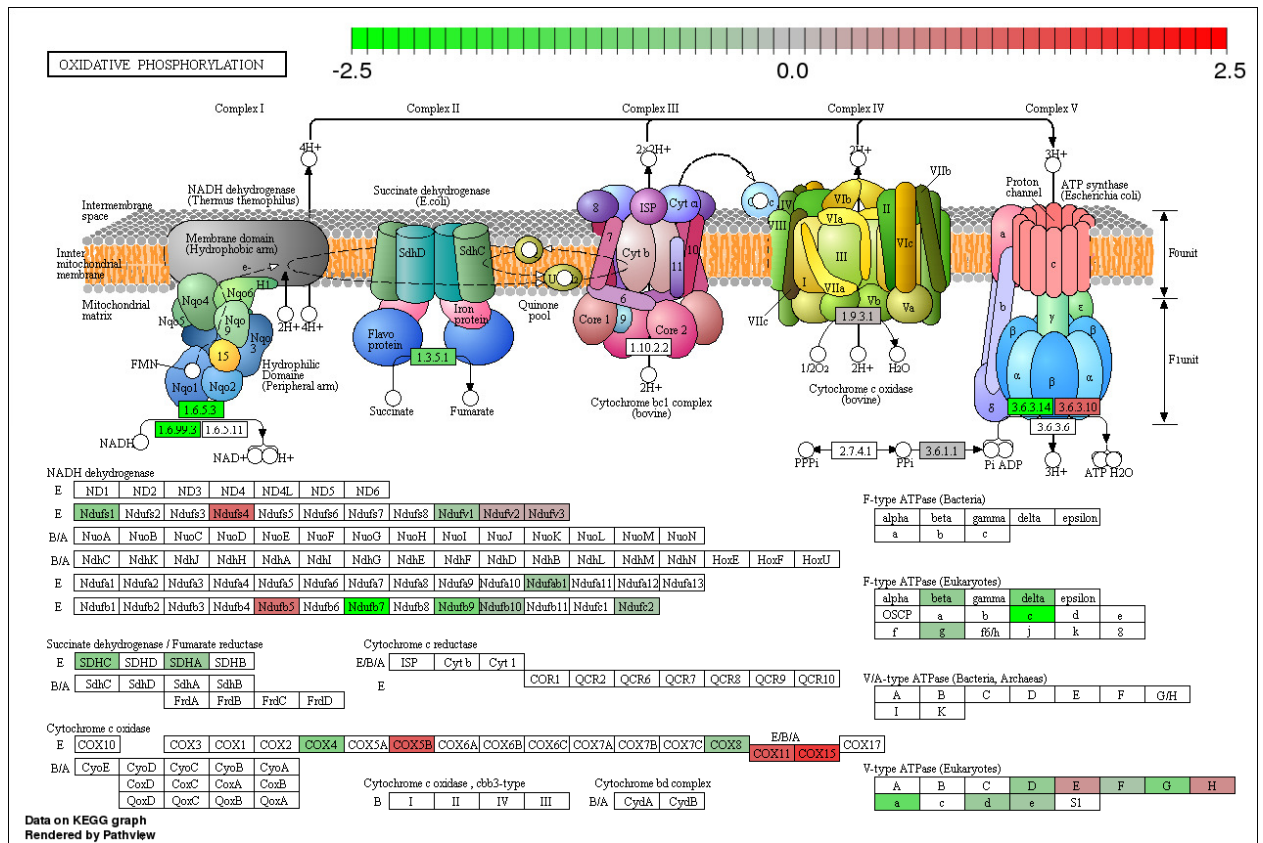

**Figure S7: Genes that are significantly differentially expressed, at any fold change, in *Spalax* compared to rat whole brain tissues and are related to Oxidative Phosphorylation pathway.** Genes with adjusted  $p$ -value  $< 0.05$  (see Table S5) are superimposed on the Oxidative Phosphorylation pathway of rat (rno00190, obtained by KEGG, Kanehisa Laboratories). Color scale represents  $\log_2FC$  value.

**Genome maintenance and bioenergetics of the long-lived hypoxia-tolerant and cancer-resistant blind mole rat, *Spalax*: a cross-species analysis of brain transcriptome**

Assaf Malik, Vered Domankevich, Han Lijuan, Fang Xiaodong, Abraham Korol, Aaron Avivi, Imad Shams

**Table S4: Functional enrichment of differentially expressed genes in *Spalax* vs. rat - brain tissues, using the tool Gorilla.** A zip file should be decompressed first. HTML files represent the results of Gorilla, including GO terms hierarchy figures which allow searching for functionally related terms.



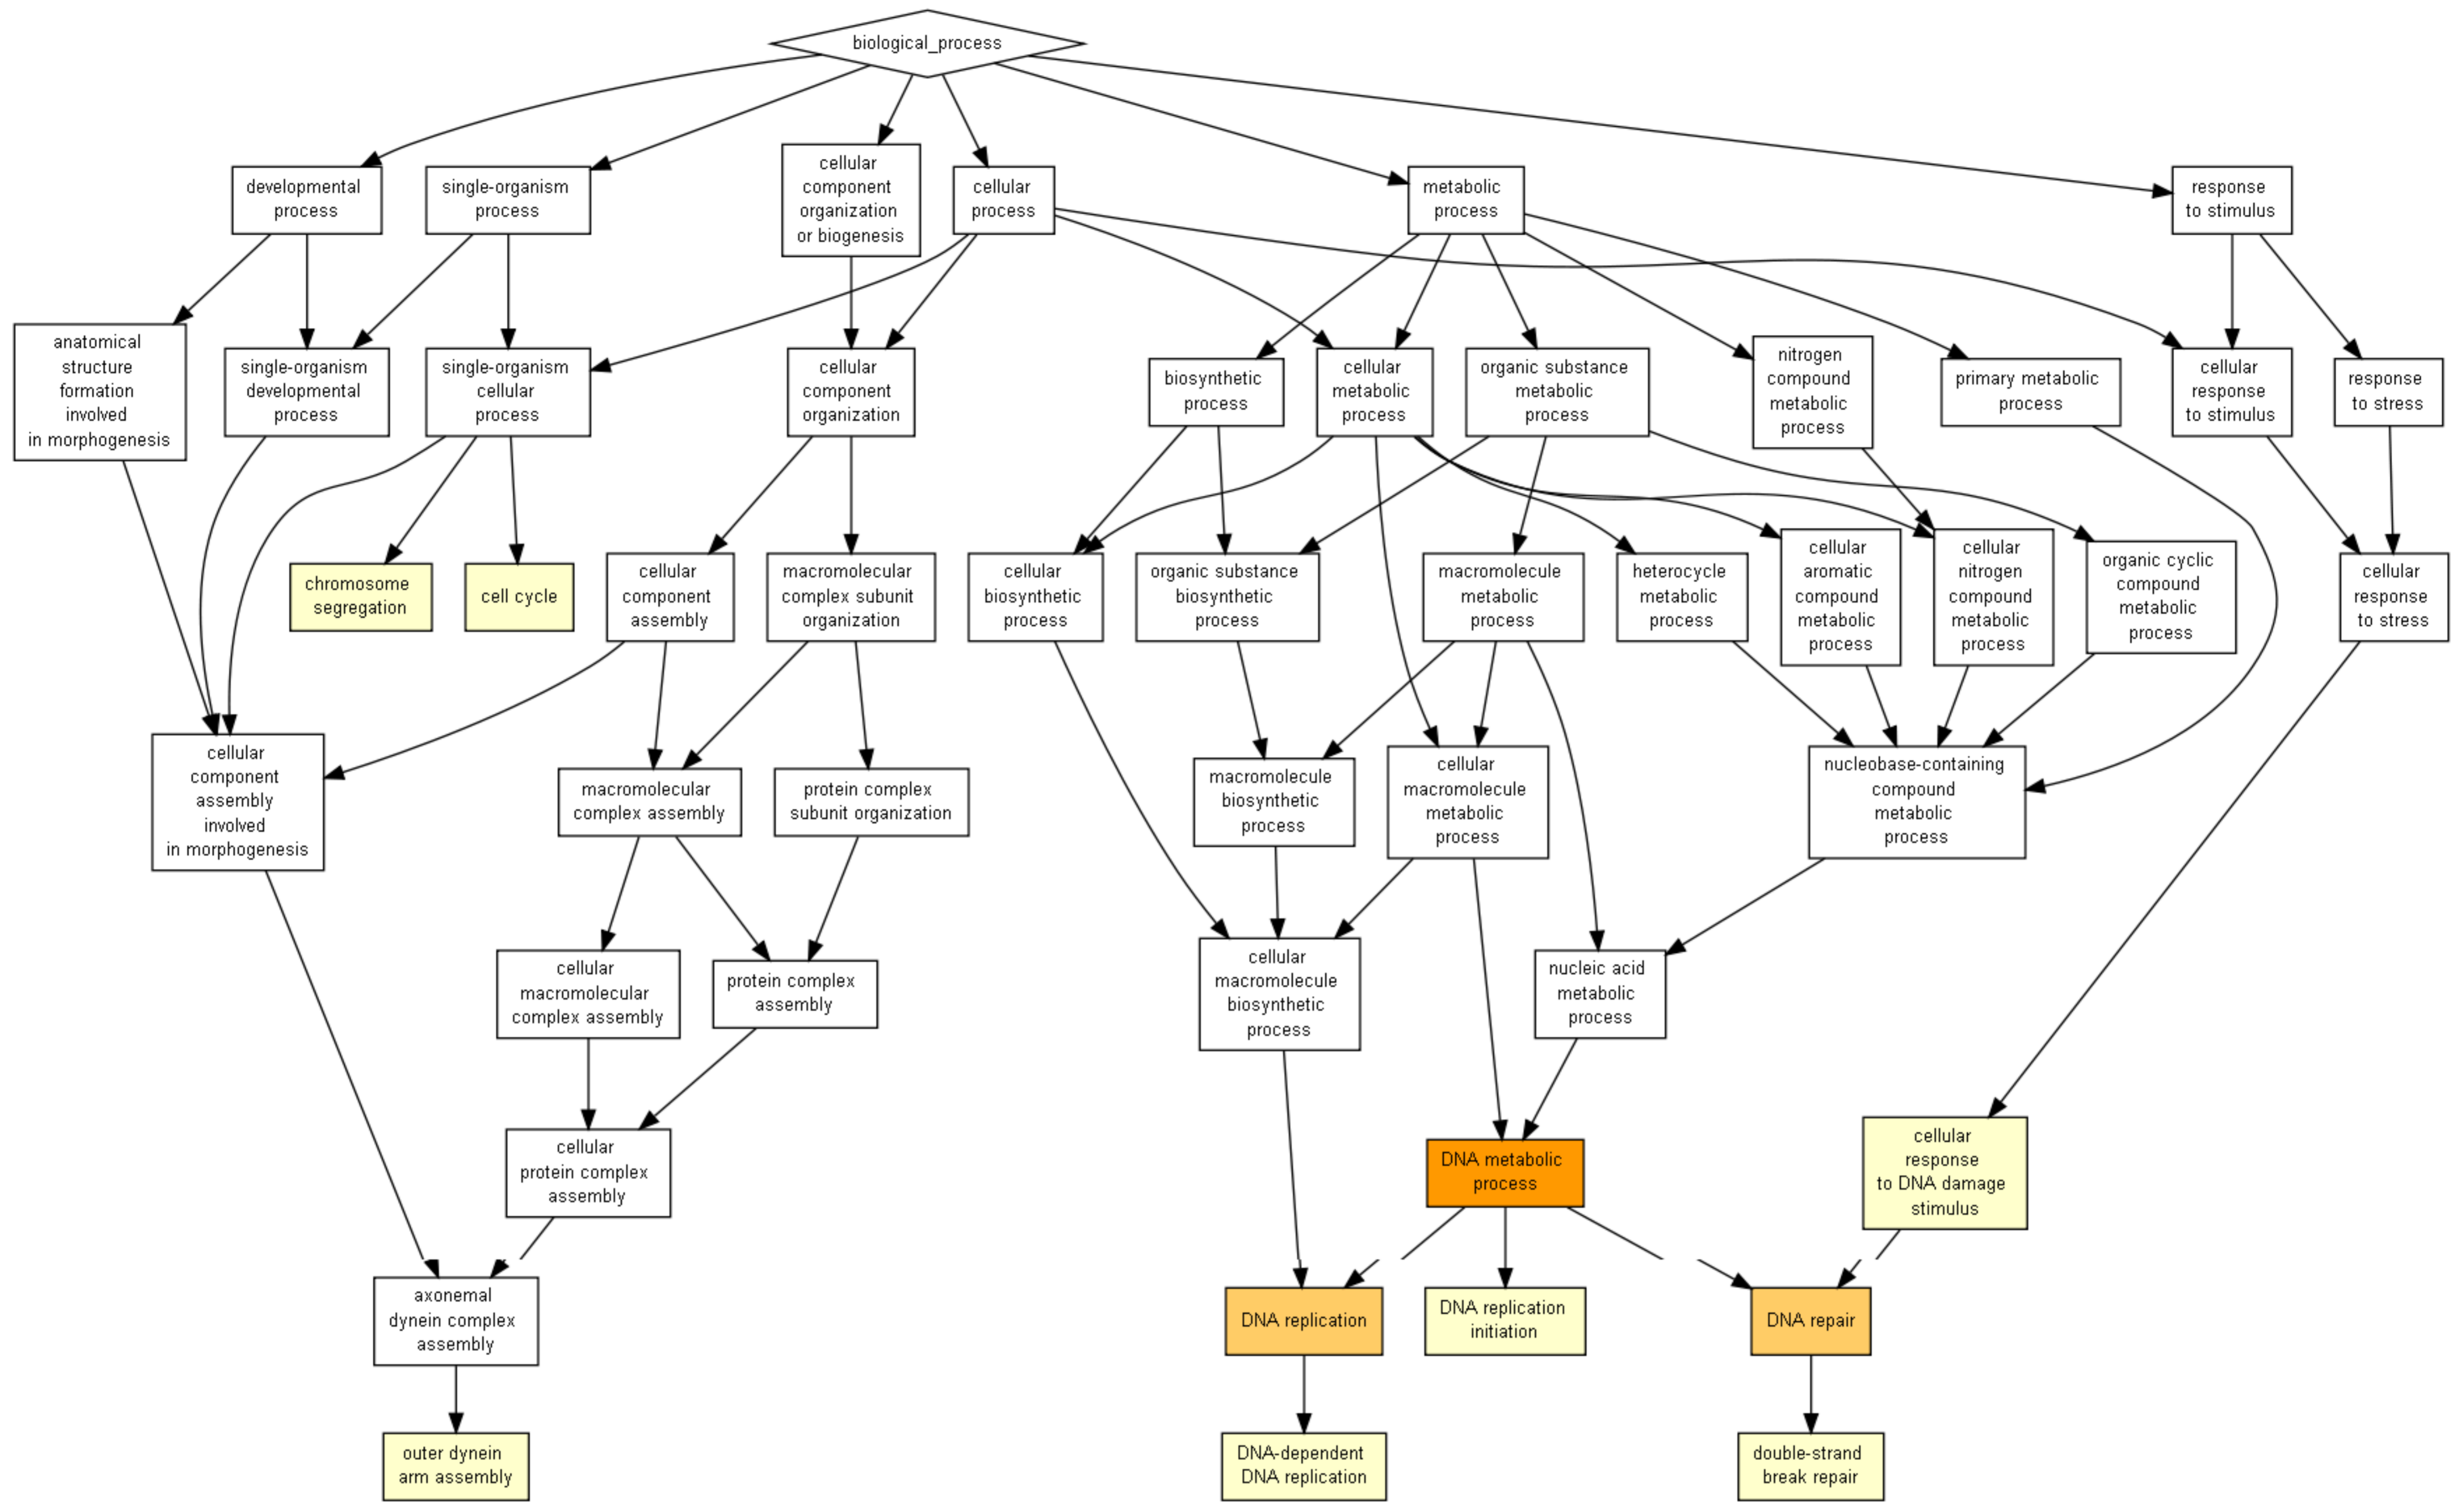

| GO term                    | Description                              | P-value | FDR q-value | Enrichment (N, B, n, b) | Genes                          |
|----------------------------|------------------------------------------|---------|-------------|-------------------------|--------------------------------|
| <a href="#">GO:0006259</a> | DNA metabolic process                    | 2.1E-9  | 2.58E-5     | 1.81 (8586,352,1250,93) | <a href="#">[+] Show genes</a> |
| <a href="#">GO:0006260</a> | DNA replication                          | 1.41E-6 | 8.64E-3     | 2.42 (8586,85,1250,30)  | <a href="#">[+] Show genes</a> |
| <a href="#">GO:0006281</a> | DNA repair                               | 4.06E-6 | 1.66E-2     | 1.78 (8586,228,1250,59) | <a href="#">[+] Show genes</a> |
| <a href="#">GO:0007049</a> | cell cycle                               | 1.5E-5  | 4.61E-2     | 1.53 (8586,394,1250,88) | <a href="#">[+] Show genes</a> |
| <a href="#">GO:0006261</a> | DNA-dependent DNA replication            | 5.14E-5 | 1.26E-1     | 3.60 (8586,21,1250,11)  | <a href="#">[+] Show genes</a> |
| <a href="#">GO:0006974</a> | cellular response to DNA damage stimulus | 1.03E-4 | 2.1E-1      | 1.51 (8586,346,1250,76) | <a href="#">[+] Show genes</a> |
| <a href="#">GO:0006270</a> | DNA replication initiation               | 2.61E-4 | 4.59E-1     | 3.93 (8586,14,1250,8)   | <a href="#">[+] Show genes</a> |
| <a href="#">GO:0007059</a> | chromosome segregation                   | 2.84E-4 | 4.37E-1     | 2.19 (8586,66,1250,21)  | <a href="#">[+] Show genes</a> |
| <a href="#">GO:0036158</a> | outer dynein arm assembly                | 5.32E-4 | 7.27E-1     | 4.58 (8586,9,1250,6)    | <a href="#">[+] Show genes</a> |
| <a href="#">GO:0006302</a> | double-strand break repair               | 6.26E-4 | 7.7E-1      | 2.00 (8586,79,1250,23)  | <a href="#">[+] Show genes</a> |

Species used: Mus musculus

The system has recognized 9851 genes out of 10359 gene terms entered by the user.  
 9851 genes were recognized by gene symbol and 0 genes by other gene IDs .  
 1254 duplicate genes were removed (keeping the highest ranking instance of each gene) leaving a total of 8597 genes.  
 Only 8586 of these genes are associated with a GO term.

[Visualize output in REViGO](#)

The GOrilla database is periodically updated using the [GO database](#) and other sources.  
 The GOrilla database was last updated on Sep 3, 2016

This results page will be available on this site for one month from now (until Oct 3, 2016 ). You can bookmark this page and come back to it later.

'P-value' is the enrichment p-value computed according to the mHG or HG model. This p-value is not corrected for multiple testing of 12291 GO terms.

'FDR q-value' is the correction of the above p-value for multiple testing using the Benjamini and Hochberg (1995) method.  
 Namely, for the i<sup>th</sup> term (ranked according to p-value) the FDR q-value is (p-value \* number of GO terms) / i.

**Enrichment (N, B, n, b)** is defined as follows:

N - is the total number of genes  
 B - is the total number of genes associated with a specific GO term  
 n - is the number of genes in the top of the user's input list or in the target set when appropriate  
 b - is the number of genes in the intersection  
 Enrichment = (b/n) / (B/N)

**Genes:** For each GO term you can see the list of associated genes that appear in the optimal top of the list.  
 Each gene name is specified by gene symbol followed by a short description of the gene

[Back to the GOrilla main page](#)

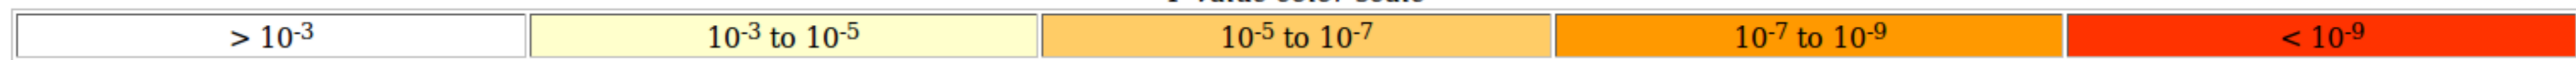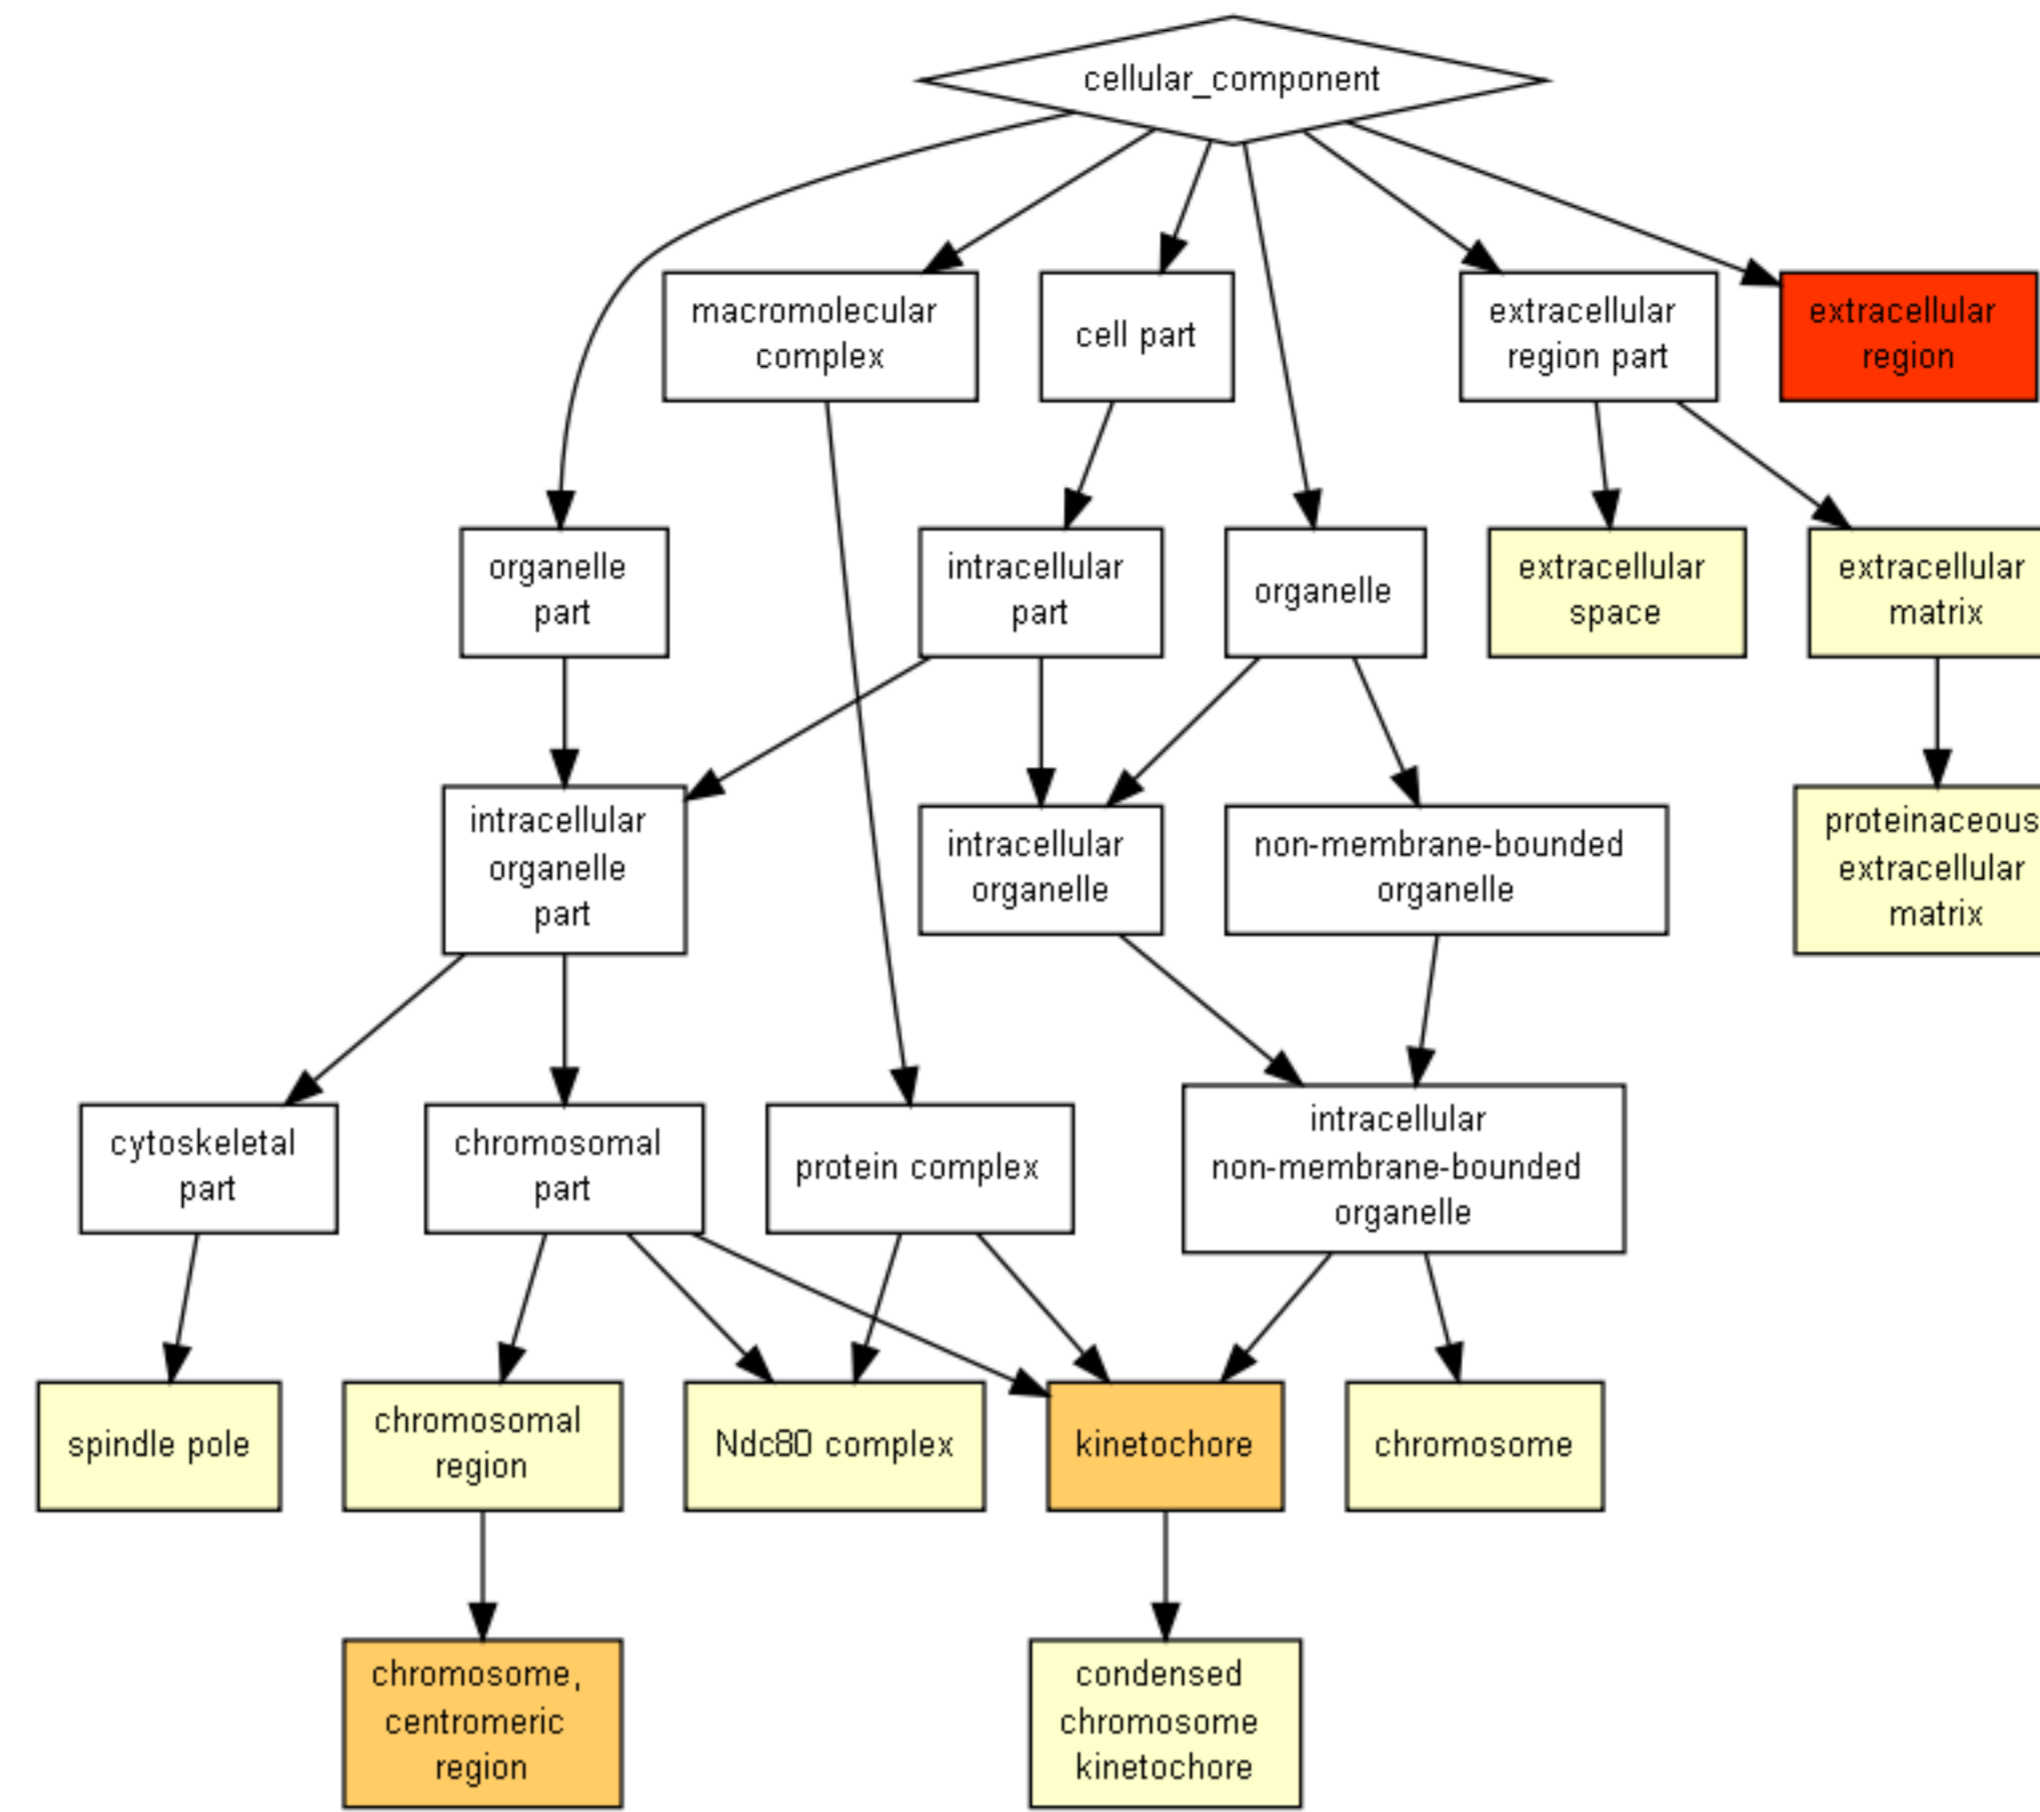

| GO term                    | Description                        | P-value  | FDR q-value | Enrichment (N, B, n, b) | Genes                          |
|----------------------------|------------------------------------|----------|-------------|-------------------------|--------------------------------|
| <a href="#">GO:0005576</a> | extracellular region               | 8.28E-14 | 1.26E-10    | 2.08 (8586,578,741,104) | <a href="#">[+] Show genes</a> |
| <a href="#">GO:0000775</a> | chromosome, centromeric region     | 1.44E-6  | 1.09E-3     | 2.96 (8586,90,741,23)   | <a href="#">[+] Show genes</a> |
| <a href="#">GO:0000776</a> | kinetochore                        | 2.57E-6  | 1.3E-3      | 3.04 (8586,80,741,21)   | <a href="#">[+] Show genes</a> |
| <a href="#">GO:0031262</a> | Ndc80 complex                      | 5.51E-5  | 2.09E-2     | 11.59 (8586,4,741,4)    | <a href="#">[+] Show genes</a> |
| <a href="#">GO:0005578</a> | proteinaceous extracellular matrix | 5.65E-5  | 1.72E-2     | 2.15 (8586,156,741,29)  | <a href="#">[+] Show genes</a> |
| <a href="#">GO:0000777</a> | condensed chromosome kinetochore   | 6.28E-5  | 1.59E-2     | 6.95 (8586,10,741,6)    | <a href="#">[+] Show genes</a> |
| <a href="#">GO:0031012</a> | extracellular matrix               | 1.39E-4  | 3.01E-2     | 1.85 (8586,238,741,38)  | <a href="#">[+] Show genes</a> |
| <a href="#">GO:0098687</a> | chromosomal region                 | 2.2E-4   | 4.18E-2     | 2.00 (8586,168,741,29)  | <a href="#">[+] Show genes</a> |
| <a href="#">GO:0005615</a> | extracellular space                | 3.82E-4  | 6.46E-2     | 1.53 (8586,478,741,63)  | <a href="#">[+] Show genes</a> |
| <a href="#">GO:0000922</a> | spindle pole                       | 5.25E-4  | 7.99E-2     | 2.79 (8586,54,741,13)   | <a href="#">[+] Show genes</a> |
| <a href="#">GO:0005694</a> | chromosome                         | 8.35E-4  | 1.16E-1     | 1.77 (8586,216,741,33)  | <a href="#">[+] Show genes</a> |

Species used: Mus musculus

The system has recognized 9342 genes out of 9821 gene terms entered by the user.  
 9342 genes were recognized by gene symbol and 0 genes by other gene IDs .  
 745 duplicate genes were removed (keeping the highest ranking instance of each gene) leaving a total of 8597 genes.  
 Only 8586 of these genes are associated with a GO term.

The GOrilla database is periodically updated using the [GO database](#) and other sources.  
 The GOrilla database was last updated on Sep 3, 2016

This results page will be available on this site for one month from now (until Oct 3, 2016 ). You can bookmark this page and come back to it later.

'P-value' is the enrichment p-value computed according to the mHG or HG model. This p-value is not corrected for multiple testing of 1521 GO terms.

'FDR q-value' is the correction of the above p-value for multiple testing using the Benjamini and Hochberg (1995) method.  
 Namely, for the  $i^{th}$  term (ranked according to p-value) the FDR q-value is  $(p\text{-value} * \text{number of GO terms}) / i$ .

**Enrichment (N, B, n, b)** is defined as follows:  
 N - is the total number of genes  
 B - is the total number of genes associated with a specific GO term  
 n - is the number of genes in the top of the user's input list or in the target set when appropriate  
 b - is the number of genes in the intersection  
 Enrichment =  $(b/n) / (B/N)$

**Genes:** For each GO term you can see the list of associated genes that appear in the optimal top of the list.  
 Each gene name is specified by gene symbol followed by a short description of the gene

[Back to the GOrilla main page](#)

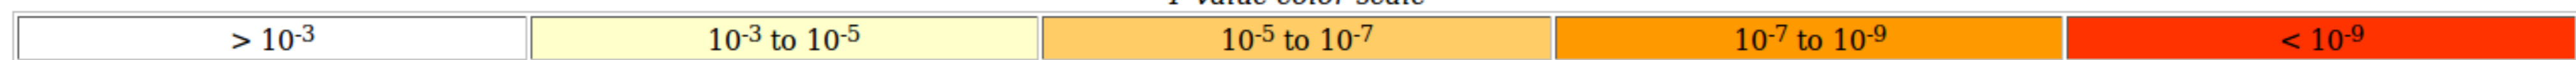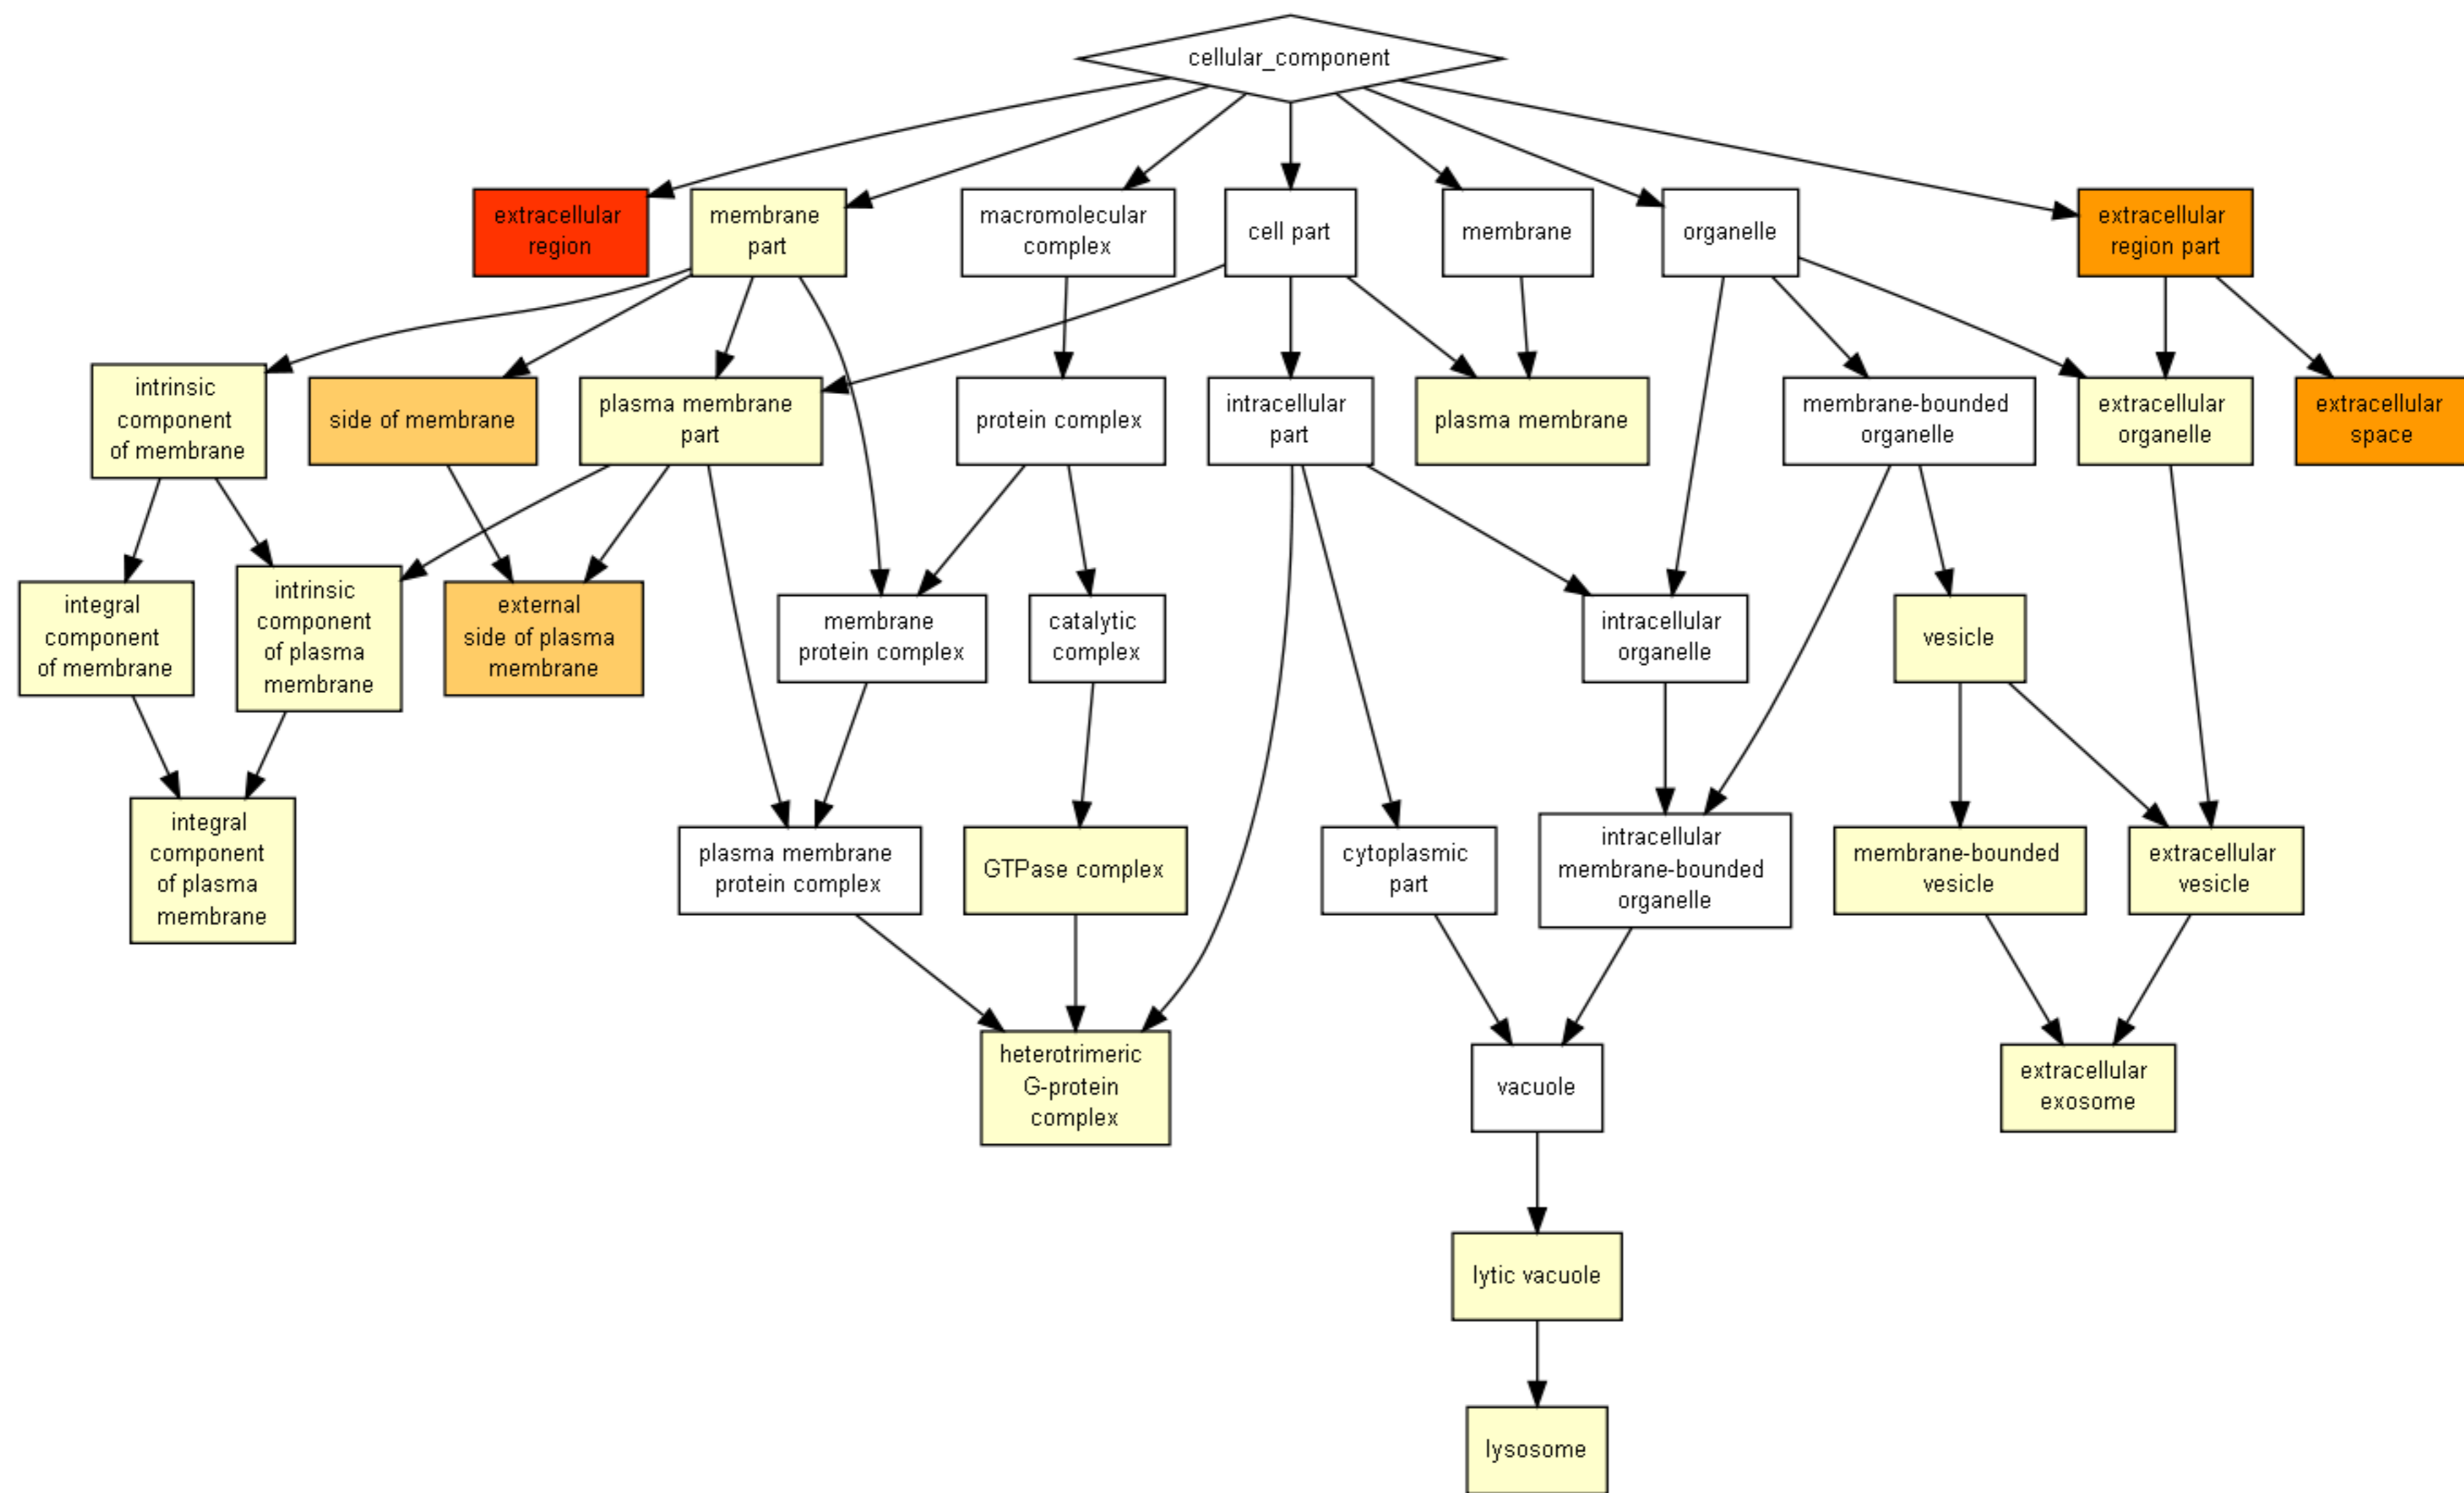

| GO term                    | Description                            | P-value  | FDR q-value | Enrichment (N, B, n, b)   | Genes                          |
|----------------------------|----------------------------------------|----------|-------------|---------------------------|--------------------------------|
| <a href="#">GO:0005576</a> | extracellular region                   | 2.23E-12 | 3.38E-9     | 1.74 (8586,578,1220,143)  | <a href="#">[+] Show genes</a> |
| <a href="#">GO:0005615</a> | extracellular space                    | 1.89E-8  | 1.43E-5     | 1.65 (8586,478,1220,112)  | <a href="#">[+] Show genes</a> |
| <a href="#">GO:0044421</a> | extracellular region part              | 3.81E-8  | 1.93E-5     | 1.29 (8586,1737,1220,319) | <a href="#">[+] Show genes</a> |
| <a href="#">GO:0009897</a> | external side of plasma membrane       | 6.29E-7  | 2.39E-4     | 2.39 (8586,97,1220,33)    | <a href="#">[+] Show genes</a> |
| <a href="#">GO:0098552</a> | side of membrane                       | 6.55E-6  | 1.99E-3     | 2.03 (8586,135,1220,39)   | <a href="#">[+] Show genes</a> |
| <a href="#">GO:0043230</a> | extracellular organelle                | 1.03E-5  | 2.61E-3     | 1.27 (8586,1345,1220,243) | <a href="#">[+] Show genes</a> |
| <a href="#">GO:0031224</a> | intrinsic component of membrane        | 1.3E-5   | 2.83E-3     | 1.20 (8586,2131,1220,363) | <a href="#">[+] Show genes</a> |
| <a href="#">GO:1903561</a> | extracellular vesicle                  | 1.39E-5  | 2.65E-3     | 1.27 (8586,1344,1220,242) | <a href="#">[+] Show genes</a> |
| <a href="#">GO:0070062</a> | extracellular exosome                  | 1.81E-5  | 3.07E-3     | 1.26 (8586,1336,1220,240) | <a href="#">[+] Show genes</a> |
| <a href="#">GO:0044425</a> | membrane part                          | 2.32E-5  | 3.53E-3     | 1.16 (8586,2768,1220,456) | <a href="#">[+] Show genes</a> |
| <a href="#">GO:0016021</a> | integral component of membrane         | 3.46E-5  | 4.79E-3     | 1.19 (8586,2073,1220,351) | <a href="#">[+] Show genes</a> |
| <a href="#">GO:0000323</a> | lytic vacuole                          | 4.36E-5  | 5.53E-3     | 1.76 (8586,192,1220,48)   | <a href="#">[+] Show genes</a> |
| <a href="#">GO:0005764</a> | lysosome                               | 4.36E-5  | 5.11E-3     | 1.76 (8586,192,1220,48)   | <a href="#">[+] Show genes</a> |
| <a href="#">GO:0031226</a> | intrinsic component of plasma membrane | 7.78E-5  | 8.45E-3     | 1.43 (8586,503,1220,102)  | <a href="#">[+] Show genes</a> |
| <a href="#">GO:0044459</a> | plasma membrane part                   | 8.54E-5  | 8.66E-3     | 1.27 (8586,1122,1220,202) | <a href="#">[+] Show genes</a> |
| <a href="#">GO:0005887</a> | integral component of plasma membrane  | 1.68E-4  | 1.6E-2      | 1.42 (8586,471,1220,95)   | <a href="#">[+] Show genes</a> |
| <a href="#">GO:0031988</a> | membrane-bounded vesicle               | 1.96E-4  | 1.76E-2     | 1.20 (8586,1611,1220,275) | <a href="#">[+] Show genes</a> |
| <a href="#">GO:0005886</a> | plasma membrane                        | 4.29E-4  | 3.63E-2     | 1.17 (8586,1841,1220,307) | <a href="#">[+] Show genes</a> |
| <a href="#">GO:0031982</a> | vesicle                                | 5.05E-4  | 4.04E-2     | 1.17 (8586,1792,1220,299) | <a href="#">[+] Show genes</a> |
| <a href="#">GO:0005834</a> | heterotrimeric G-protein complex       | 8.99E-4  | 6.84E-2     | 3.79 (8586,13,1220,7)     | <a href="#">[+] Show genes</a> |
| <a href="#">GO:1905360</a> | GTPase complex                         | 8.99E-4  | 6.51E-2     | 3.79 (8586,13,1220,7)     | <a href="#">[+] Show genes</a> |

Species used: Mus musculus

The system has recognized 9823 genes out of 10280 gene terms entered by the user.  
 9823 genes were recognized by gene symbol and 0 genes by other gene IDs .  
 1226 duplicate genes were removed (keeping the highest ranking instance of each gene) leaving a total of 8597 genes.  
 Only 8586 of these genes are associated with a GO term.

The GOrilla database is periodically updated using the [GO database](#) and other sources.  
 The GOrilla database was last updated on Sep 3, 2016

This results page will be available on this site for one month from now (until Oct 3, 2016 ). You can bookmark this page and come back to it later.

'P-value' is the enrichment p-value computed according to the mHG or HG model. This p-value is not corrected for multiple testing of 1521 GO terms.

'FDR q-value' is the correction of the above p-value for multiple testing using the Benjamini and Hochberg (1995) method.  
 Namely, for the  $i^{th}$  term (ranked according to p-value) the FDR q-value is  $(p\text{-value} * \text{number of GO terms}) / i$ .

**Enrichment (N, B, n, b)** is defined as follows:  
 N - is the total number of genes  
 B - is the total number of genes associated with a specific GO term  
 n - is the number of genes in the top of the user's input list or in the target set when appropriate  
 b - is the number of genes in the intersection  
 Enrichment =  $(b/n) / (B/N)$

**Genes:** For each GO term you can see the list of associated genes that appear in the optimal top of the list.  
 Each gene name is specified by gene symbol followed by a short description of the gene

[Back to the GOrilla main page](#)
